# Supplementary material for: Secular Trends in Ablation Therapy for Graves’ Disease: An Analysis of a 15-Year Experience at a Tertiary Hospital in South Korea
Source: MDPI journal article supplement (doi:10.3390/jcm10081629), 2021-04-12

**Supplementary Table S1.** Adverse effects of ATD requiring the ablation therapy.

|                                              | <b>Total</b> | <b>Methimazole</b> | <b>PTU</b> | <i>p</i> |
|----------------------------------------------|--------------|--------------------|------------|----------|
| Total number <sup>a</sup>                    | 10,986       | 9,939              | 2,333      |          |
| Number of adverse events, n (%) <sup>b</sup> | 154 (1.4)    | 110 (1.1)          | 66 (2.8)   | <0.01    |
| Toxic hepatitis, n (%)                       | 69 (0.6)     | 47 (0.5)           | 26 (1.1)   | <0.01    |
| Agranulocytosis, n (%)                       | 45 (0.4)     | 32 (0.3)           | 13 (0.6)   | 0.08     |
| Urticaria/skin rash, n (%)                   | 34 (0.3)     | 30 (0.3)           | 27 (1.2)   | <0.01    |

ATD, anti-thyroid drug; PTU, propylthiouracil.

<sup>a</sup> Among total patients, 1,286 patients used both ATDs.

<sup>b</sup> 22 patients had adverse effects to both ATDs.

**Supplementary Figure S1.** Remission rate for RAI therapy and surgery over time.

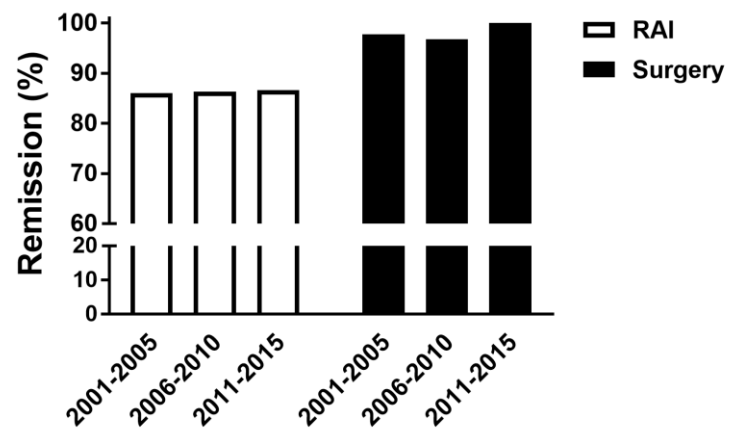

Supplement: s1 [file s1]
